# Supplementary material for: The voltage-gated sodium channel EF-hands form an interaction with the III-IV linker that is disturbed by disease-causing mutations
Source: Sci Rep. 2018 Mar 14;8:4483. doi: 10.1038/s41598-018-22713-y (PMC5852250; doi:10.1038/s41598-018-22713-y)
Supplement: Supplementary file 1 — Supplementary Information [file 41598_2018_22713_MOESM1_ESM.pdf]

## **The voltage-gated sodium channel EF-hands forms an interaction with the III-IV linker that is disturbed by disease-causing mutations**

Bernd R. Gardill<sup>1</sup>, Ricardo E. Rivera-Acevedo<sup>1,2</sup>, Ching-Chieh Tung<sup>1</sup>, Mark Okon<sup>1,3</sup>, Lawrence McIntosh<sup>1,3</sup>, Filip Van Petegem<sup>1,\*</sup>

<sup>1</sup> The University of British Columbia, Department of Biochemistry and Molecular Biology, 2350 Health Sciences Mall, Vancouver, BC Canada V6T 1Z3

<sup>2</sup> Current affiliation: The University of British Columbia, Department of Anesthesiology, Pharmacology, and Therapeutics, 2176 Health Sciences Mall, Vancouver, BC Canada V6T 1Z3

<sup>3</sup> The University of British Columbia, Department of Chemistry, 2350 Health Sciences Mall, Vancouver, BC Canada V6T 1Z3

\*Corresponding Author: Filip Van Petegem, The University of British Columbia, Department of Biochemistry and Molecular Biology, 2350 Health Sciences Mall – Rm 2.356, Vancouver, BC Canada V6T 1Z3, Phone: +1 604 827 4267, Email: [filip.vanpetegem@gmail.com](mailto:filip.vanpetegem@gmail.com)

### **SUPPLEMENTARY MATERIAL**

#### **Supplemental Figures and Figure legends**

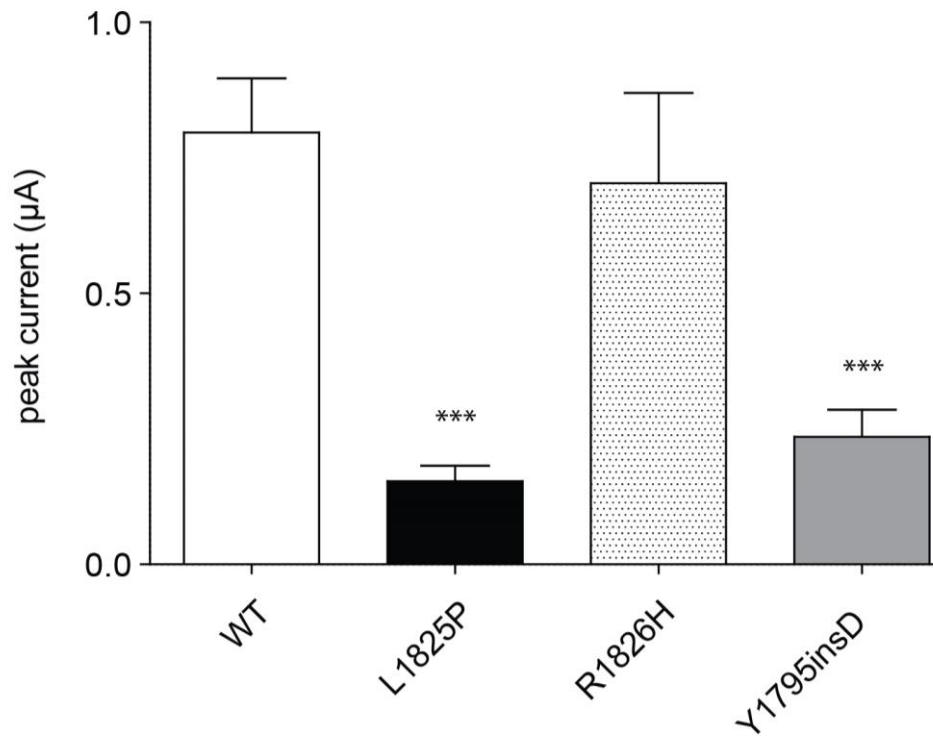

**Figure S1 Comparisons of Na<sub>v</sub>1.5 disease mutants that cause a decrease in current amplitude.** All channels were co-expressed with Na<sub>v</sub>β1 subunit in *Xenopus laevis* oocytes. Currents in response to a pulse to -20mV from a -110 mV holding potential and measured 50h after mRNA injection. WT (1.083 ± 0.151 μA *n* = 6); L1825P (0.270 ± 0.57 μA *n* = 7); R1826H (0.884 ± 0.205 μA *n* = 5); Y1795insD (0.283 ± 0.052 μA *n* = 6). Bar graphs represent mean of peak current amplitude (μA) and error bars represent standard error of mean. One-way ANOVA with Dunnetts multiple comparison post test performed to compare WT vs mutant channels mean current amplitude. \*\*\* *p* < 0.001.

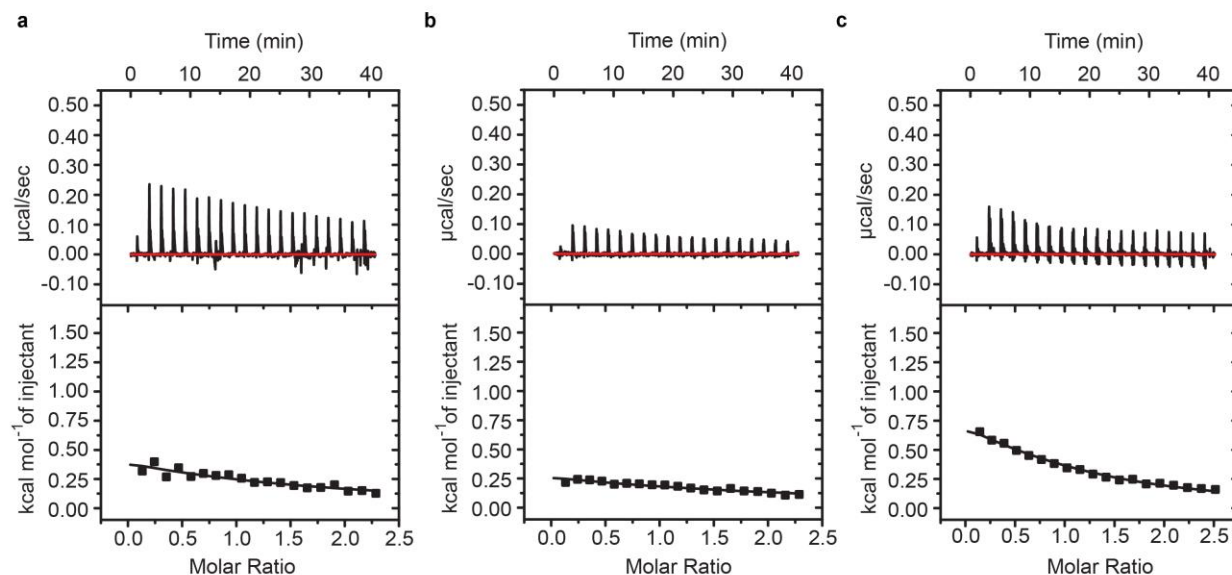

**Figure S2 Isothermal titration calorimetry data of EF-hand interaction with designed III-IV linker mutants.** EF-hand domain (175  $\mu\text{M}$ ) was either titrated with 2 mM mutant peptide or 2.2 mM in the case of R1512E/K1516E. The mutations show a reduction in binding affinity making a reliable fit difficult. The introduced mutations were a) K1492E/K1493E, b) K1499E/K1500E and c) R1512E/K1516E.

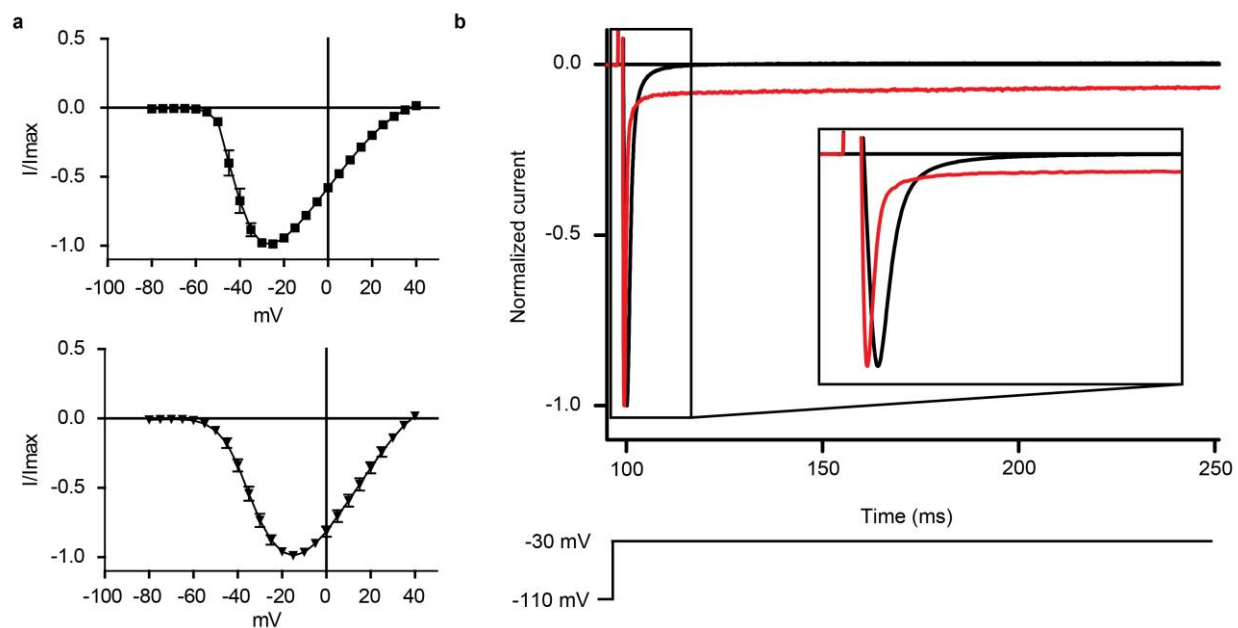

**Figure S3 Electrophysiology data obtained for wild-type and K1504/1505E mutant.** a) I/V curve for wild-type and mutant, top panel and bottom panel, respectively. A small depolarizing shift is visible for the mutant, possibly through changing the charges near domain IV VSD. b) Normalized single pulse to -30 mV shown for wild-type (black) and mutant (red). The mutant displays a pronounced late current.

## Supplemental Tables

**Table S1 Thermal denaturation determined by Thermofluor assay**

|             | Denaturation midpoint $T_m$ (°C) | Std. Error of Boltzmann fit | Number of repeats |
|-------------|----------------------------------|-----------------------------|-------------------|
| WT          | 56.46                            | 0.04528                     | 4                 |
| D1790G      | 50.44                            | 0.09533                     | 6                 |
| Y1795C      | 56.69                            | 0.05187                     | 5                 |
| R1826H      | 41.91                            | 0.02340                     | 6                 |
| Q1832E      | 55.71                            | 0.05585                     | 5                 |
| D1839G      | 57.09                            | 0.03409                     | 5                 |
| R1860Gfs*12 | 42.60                            | 0.2684                      | 3                 |
| V1861I      | 52.35                            | 0.1068                      | 5                 |
| K1872N      | 53.34                            | 0.03216                     | 5                 |

**Table S2 Inactivation properties of  $Na_v1.5$  co-expressed with  $\beta 1$**

|               | $V_{1/2}$             | $k$              | $n$ |
|---------------|-----------------------|------------------|-----|
| L1825P        | $-82.59 \pm 0.42$ mV* | $4.833 \pm 0.11$ | 7   |
| R1826H        | $-73.67 \pm 0.15$ mV  | $4.587 \pm 0.13$ | 13  |
| Y1795insD     | $-82.25 \pm 0.98$ mV* | $4.643 \pm 0.24$ | 8   |
| Wild-type     | $-73.13 \pm 0.07$ mV  | $4.582 \pm 0.06$ | 9   |
| K1504E K1505E | $-92.61 \pm 0.37$ mV* | $6.259 \pm 0.27$ | 10  |

$V_{1/2}$  is the membrane voltage of half-maximal inactivation and  $k$  is the slope factor. Errors represented as standard error of the mean (SEM). Number of measured oocytes  $n$ . \*  $p < 0.0001$  compared to Wild-type

**Table S3 Effects and phenotypes of disease mutations**

| Mutation (reference)       | Activation shift (mV)                      | Inactivation shift (mV)                                 | Late current, increase over WT                 | Peak current               | Clinical phenotype   |
|----------------------------|--------------------------------------------|---------------------------------------------------------|------------------------------------------------|----------------------------|----------------------|
| L1786Q <sup>62</sup>       | +15.2                                      | -21.3                                                   | 3-fold                                         | Decreased                  | Concealed BrS + LQTS |
| S1787N <sup>35</sup>       | n.s.d.                                     | n.s.d.                                                  | 2.1- to 2.9-fold, pH and isoform dependent     | n.s.d.                     | BrS + LQTS + SIDS    |
| D1790G <sup>24,25</sup>    | n.s.d.                                     | -16, in presence of $\beta$ 1; n.s.d. without $\beta$ 1 | n.s.d.                                         | n.s.d.                     | BrS + LQTS           |
| Y1795insD <sup>30,31</sup> | n.s.d. <sup>31</sup><br>+8.1 <sup>30</sup> | -9.7 <sup>31</sup><br>-7.3 <sup>30</sup>                | 3.4-fold <sup>31</sup><br>n.s.d. <sup>30</sup> | Decreased <sup>30</sup>    | BrS + LQTS           |
| Y1795C <sup>36</sup>       | n.s.d.                                     | n.s.d.                                                  | 4 to 5-fold                                    | Increased                  | LQTS                 |
| Y1795H <sup>36</sup>       | n.s.d.                                     | -10.5                                                   | 2.5-fold                                       | Decreased                  | BrS                  |
| L1825P <sup>29,46</sup>    | +8.9 <sup>29</sup><br>n.s.d. <sup>46</sup> | -11 <sup>29</sup><br>-7.3 <sup>46</sup>                 | 8-fold <sup>29</sup><br>2.5-fold <sup>46</sup> | Decreased <sup>29,46</sup> | BrS + LQTS           |
| C1850S <sup>37</sup>       | n.s.d.                                     | -11.6                                                   | n.a.                                           | Decreased                  | BrS                  |

SIDS, sudden infant death syndrome; n.s.d. no significant difference; n.a. not available
